# Supplementary material for: Measurement Report: Determination of aerosol vertical features ondifferent time-scales over East Asia based on CATS aerosol products
Source: Copernicus journal article supplement (doi:10.5194/acp-2020-715), 2020-08-10
Supplement: Supplementary file 1 [file acp-2020-715-supplement.pdf]

# Measurement Report: Determination of aerosol vertical features on different time-scales over East Asia based on CATS aerosol products

Yueming Cheng<sup>1,2</sup>, Tie Dai<sup>1,2\*</sup>, Jiming Li<sup>3</sup>, Guangyu Shi<sup>1,2</sup>

5 <sup>1</sup>Collaborative Innovation Center on Forecast and Evaluation of Meteorological Disasters, Nanjing University of Information Science and Technology, Nanjing, China

<sup>2</sup>State Key Laboratory of Numerical Modeling for Atmospheric Sciences and Geophysical Fluid Dynamics, Institute of Atmospheric Physics, Chinese Academy of Sciences, Beijing, China

10 <sup>3</sup>Key Laboratory for Semi-Arid Climate Change of the Ministry of Education, College of Atmospheric Sciences, Lanzhou University, Lanzhou, China

*Corresponding author:* Tie Dai (daitie@mail.iap.ac.cn)

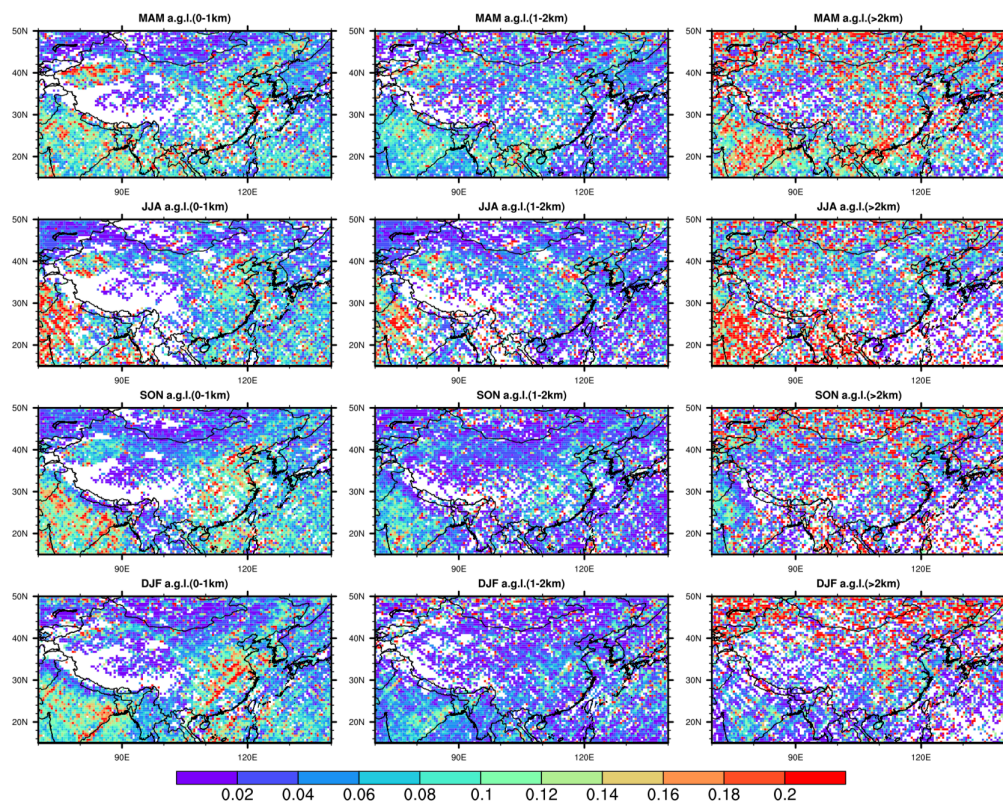

15 **Figure S1. Spatial distributions of AOTs from CATS at 1064 nm during 2015-2017 by season below 1 km, between 1 and 2 km, and above 2 km a.g.l..**

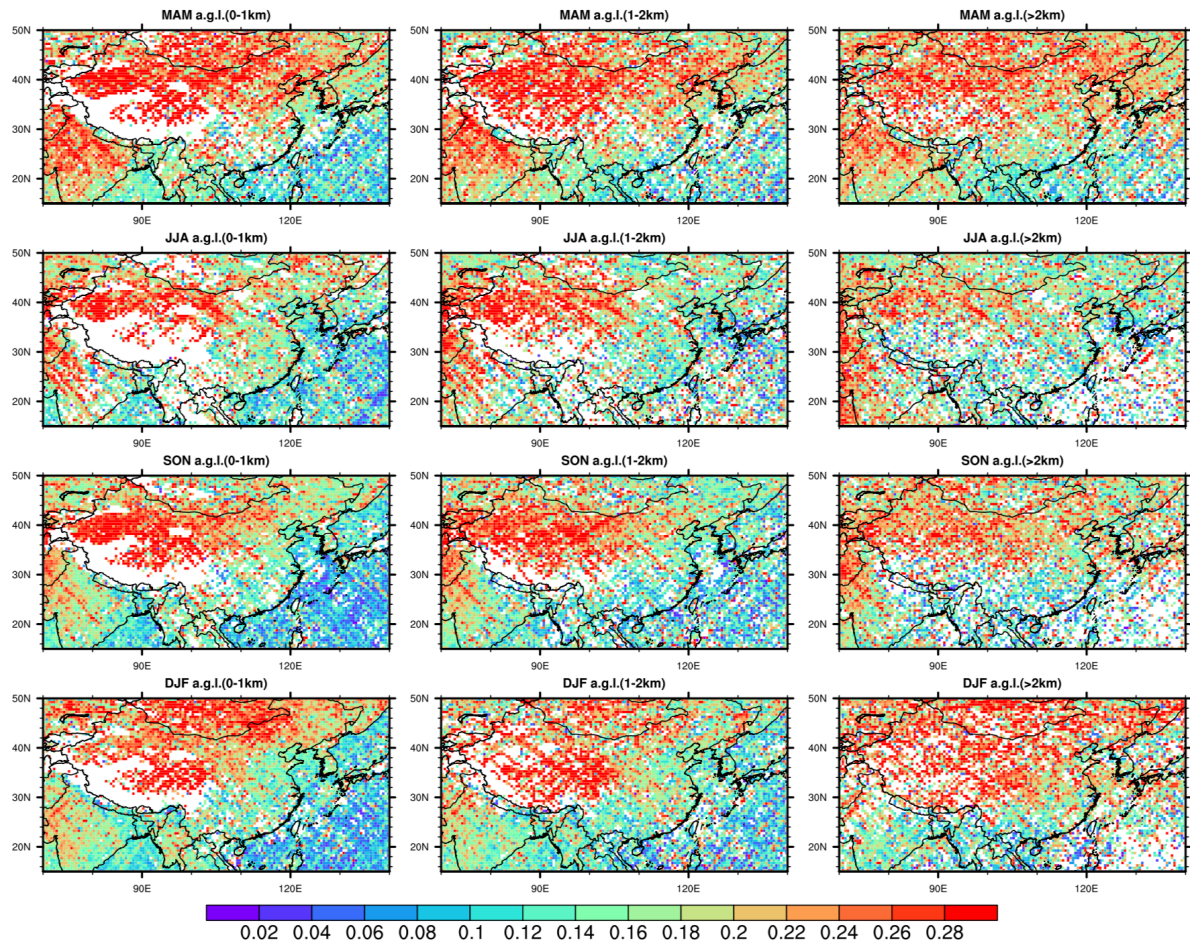

Figure S2. Same as Fig. S1 but for total depolarization ratios.

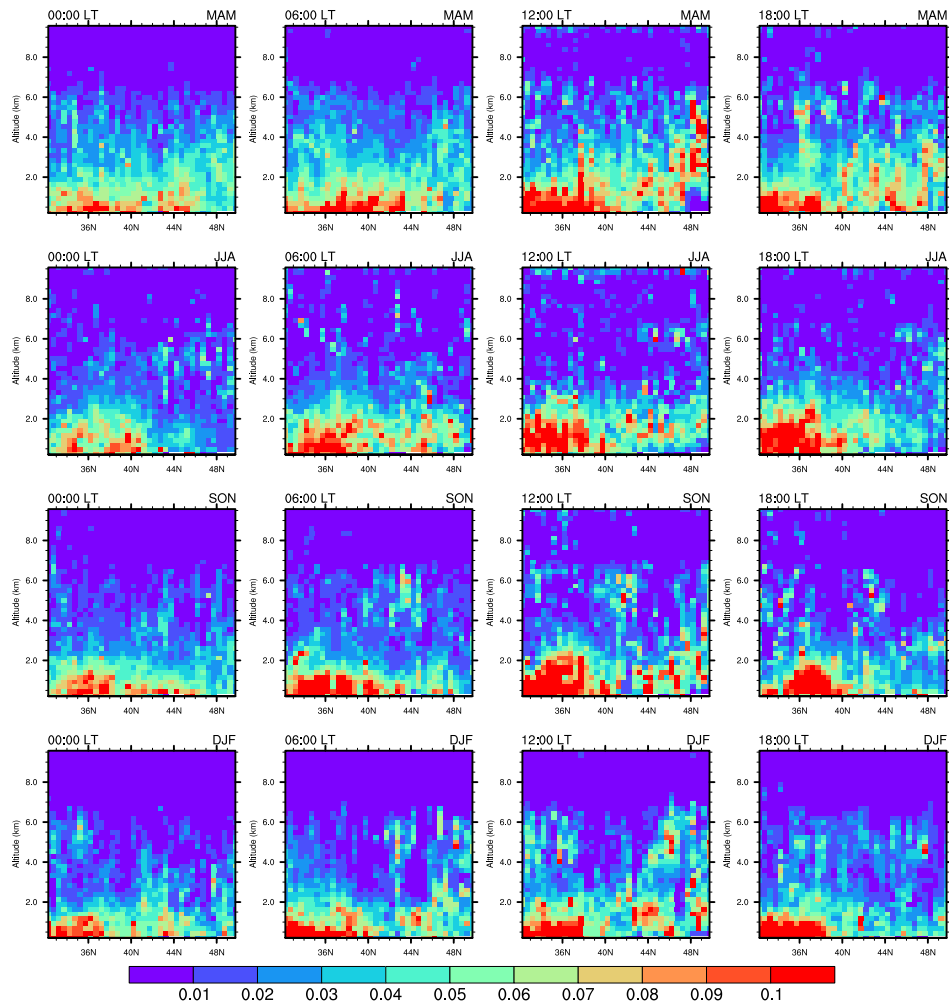

20 **Figure S3. 6 h (00:00, 06:00, 12:00, 18:00 LT) vertical structure of 1064 nm aerosol extinction coefficients ( $\text{km}^{-1}$ ) observed from CATS by season over North China in relation to zonal mean regional surface altitude.**

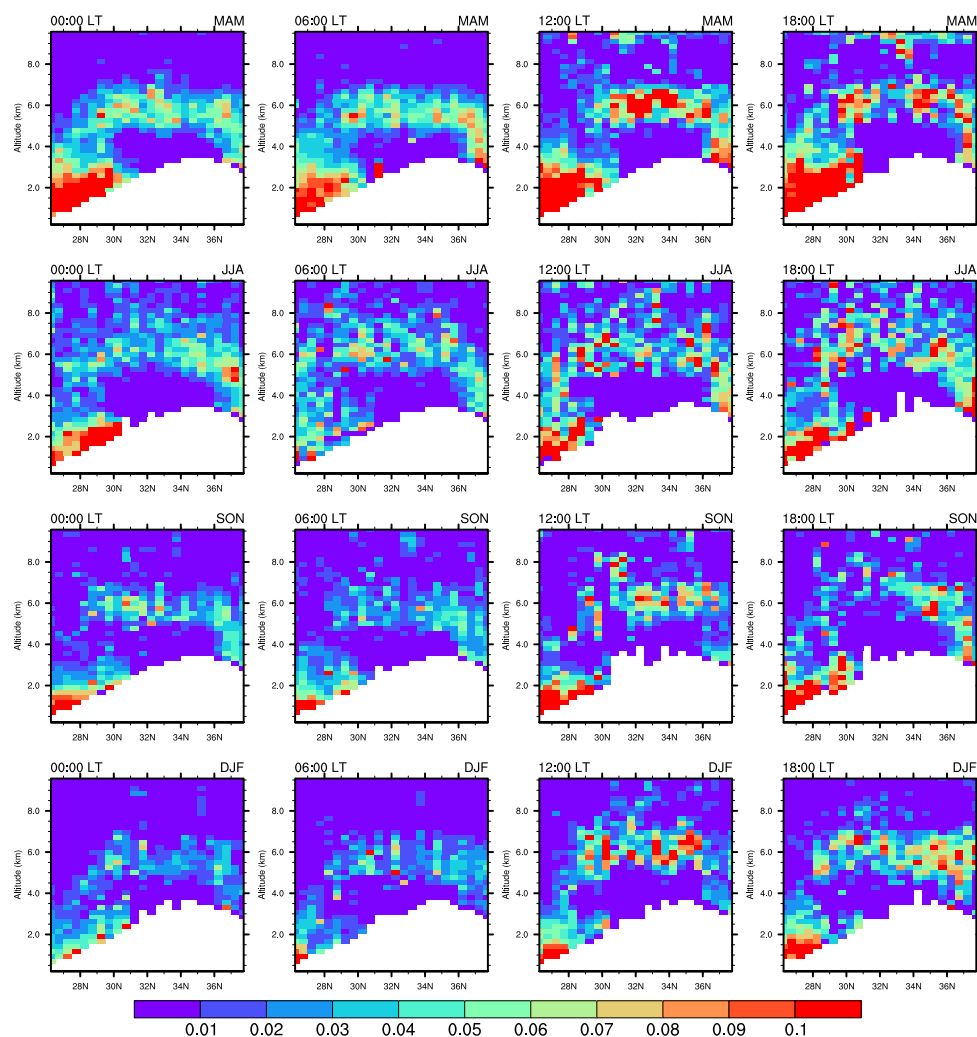

**Figure S4.** Same as Fig. S3 but for Tibetan Plateau.

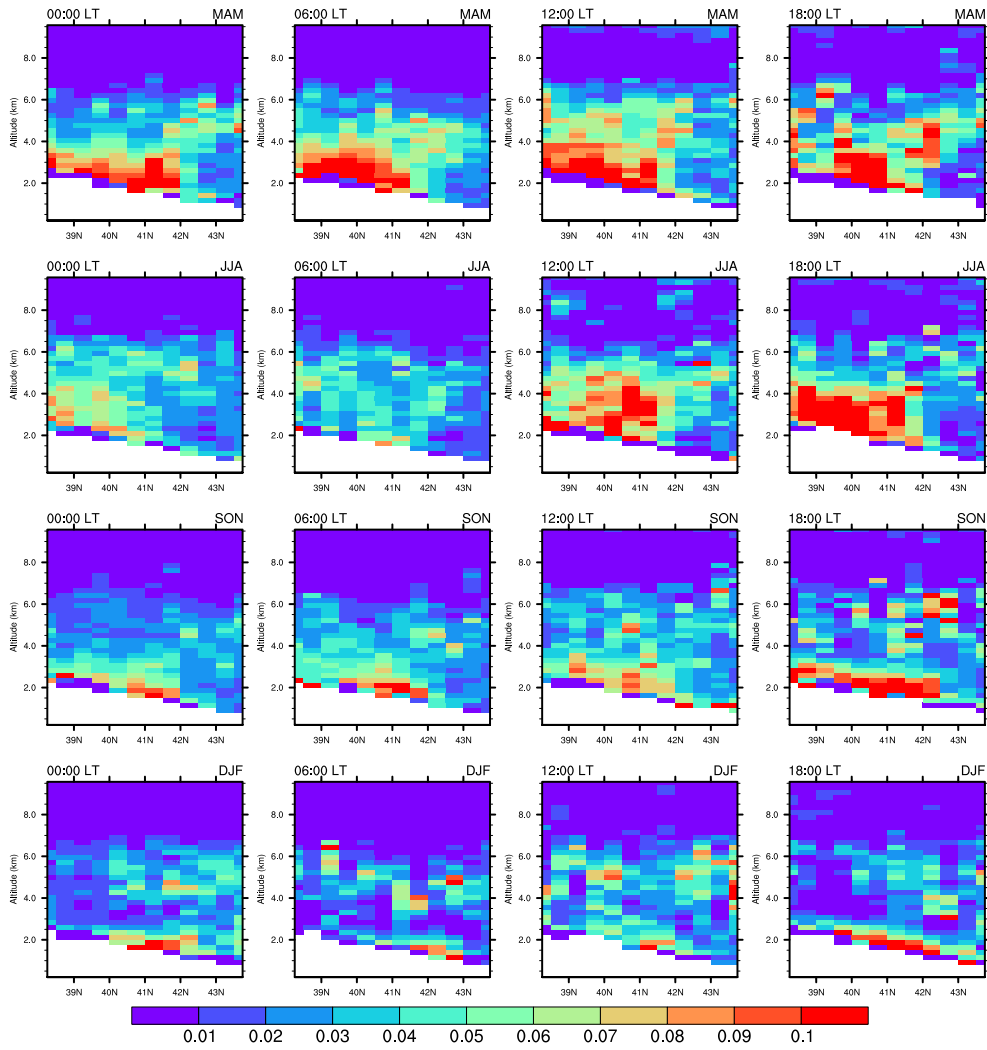

25 **Figure S5.** Same as Fig. S3 but for Tarim Basin.

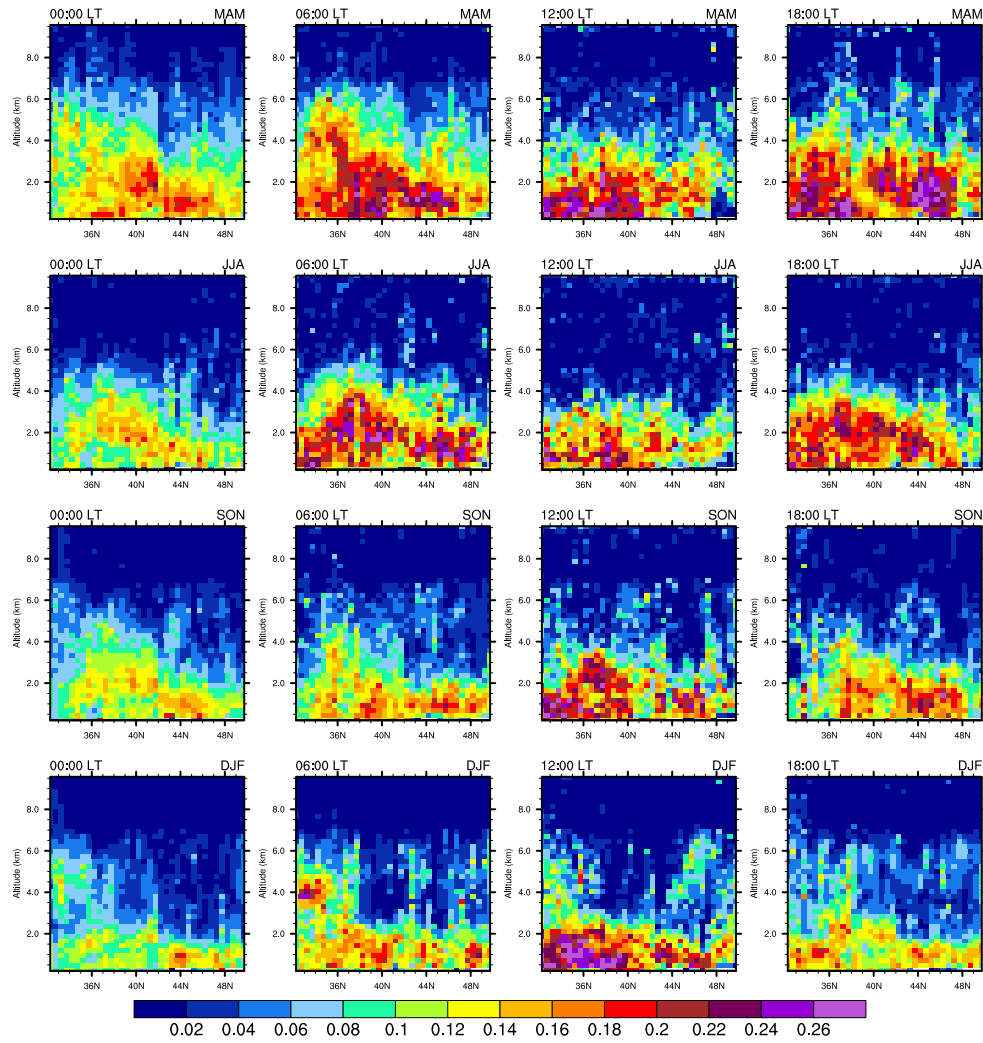

**Figure S6. 6 h (00:00, 06:00, 12:00, 18:00 LT) vertical structure of total depolarization ratios observed from CATS by season over North China relation to zonal mean regional surface altitude.**



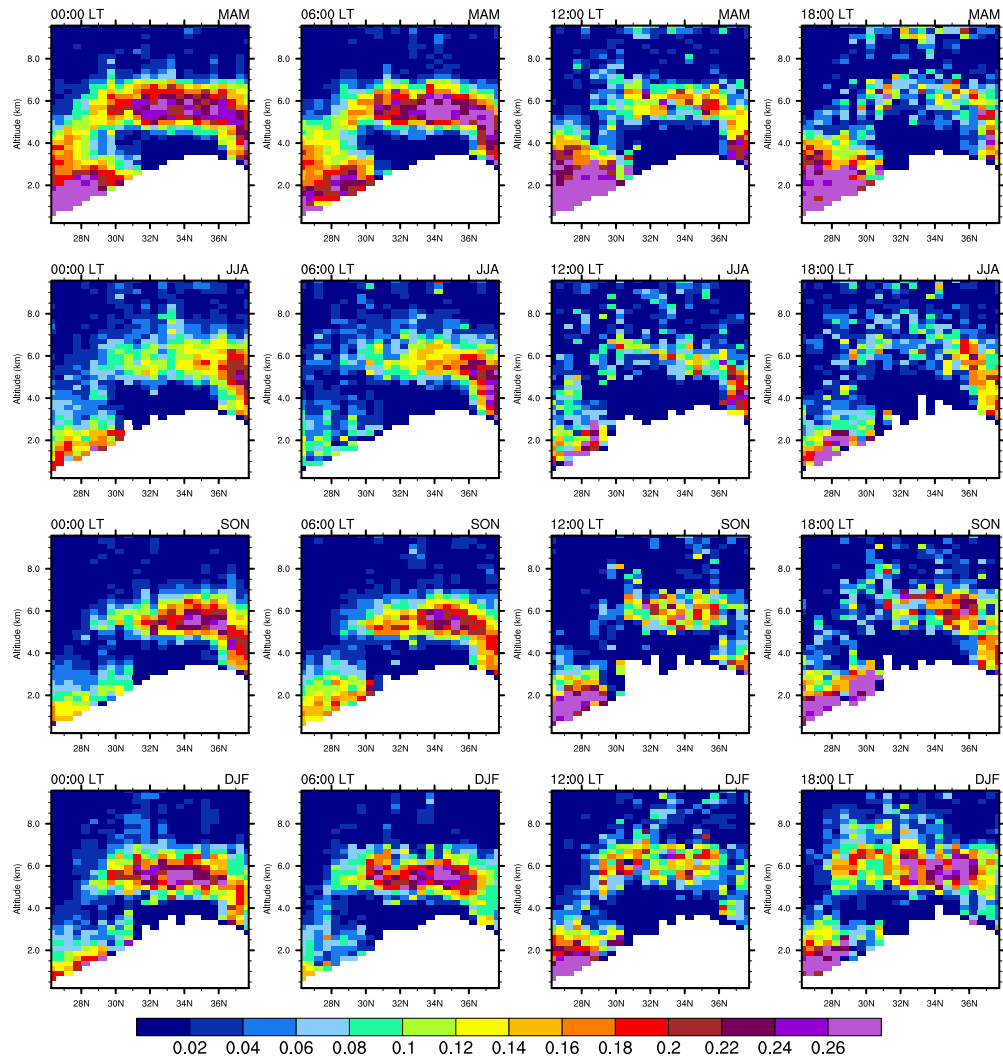

30 Figure S7. Same as Fig. S6 but for Tibetan Plateau.



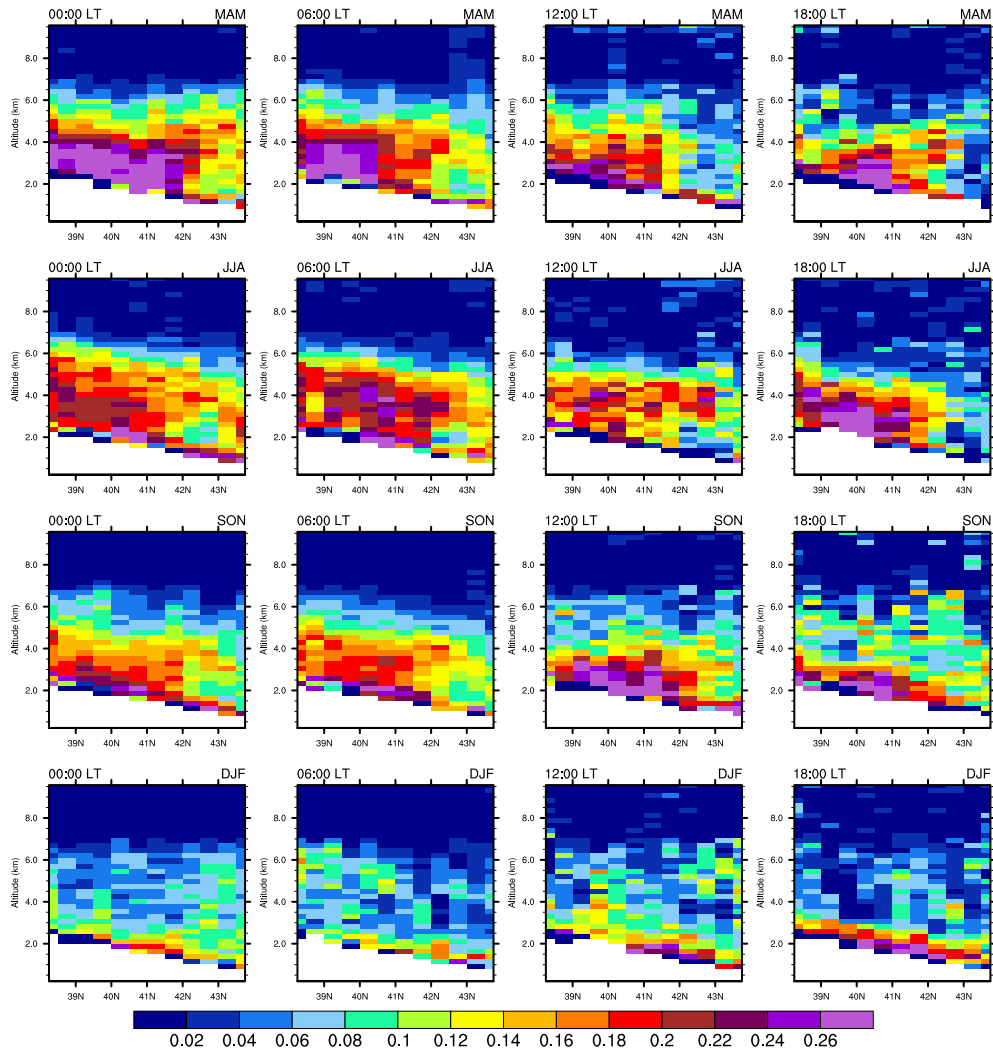

**Figure S8.** Same as Fig. S6 but for Tarim Basin.
